# Supplementary material for: Clinical application of targeted next-generation sequencing in pneumonia diagnosis among cancer patients
Source: Front Cell Infect Microbiol. 2025 Feb 18;15:1497198. doi: 10.3389/fcimb.2025.1497198 (PMC11876428; doi:10.3389/fcimb.2025.1497198)
Supplement: Supplementary file 2 [file Table1.xlsx]

## Sheet: Sheet1
Supplementary Table 1. The list of pathogenic microorganisms in tNGS assay.
Bacteria	Bacteria	Bacteria	Fungi or Parasite	Virus
Plesiomonas shigelloides	Achromobacter dolens	Klebsiella granulomatis	Actinomucor elegans	Human alphaherpesvirus 1
Abiotrophia defectiva	Bacteroides eggerthii	Klebsiella michiganensis	Alternaria alternata	Human alphaherpesvirus 2
Achromobacter xylosoxidans	Bacteroides stercoris	Klebsiella pneumoniae subsp. ozaenae	Apophysomyces elegans	Human alphaherpesvirus 3
Achromobacter denitrificans	Achromobacter ruhlandii	Klebsiella pneumoniae subsp. rhinoscleromatis	Aspergillus fumigatus	Human gammaherpesvirus 4
Achromobacter piechaudii	Tsukamurella ocularis	Klebsiella quasipneumoniae	Aspergillus flavus	Human betaherpesvirus 5
Acinetobacter bereziniae	Tsukamurella asaccharolytica	Klebsiella oxytoca	Aspergillus niger	Human betaherpesvirus 6
Acinetobacter johnsonii	Acinetobacter beijerinckii	Klebsiella aerogenes	Aspergillus terreus	Human betaherpesvirus 6A
Acinetobacter haemolyticus	Gemella sanguinis	Klebsiella variicola	Aspergillus nidulans	Human betaherpesvirus 6B
Acinetobacter junii	Tsukamurella sputi	Klebsiella pneumoniae	Aspergillus oryzae	Human betaherpesvirus 7
Acinetobacter lwoffii	Paraclostridium dentum	Kluyvera ascorbata	Aspergillus versicolor	Human gammaherpesvirus 8
Acinetobacter calcoaceticus/baumannii complex	Haemophilus aegyptius	Kluyvera intermedia	Blastomyces dermatitidis	Human adenovirus 1
Acinetobacter baumannii	Veillonella rogosae	Kocuria rosea	Candida albicans	Human adenovirus 2
Acinetobacter calcoaceticus	Achromobacter marplatensis	Kocuria varians	Candida tropicalis	Human adenovirus B3
Acinetobacter lactucae	Achromobacter mucicolens	Kytococcus sedentarius	Candida parapsilosis	Human adenovirus E4
Acinetobacter seifertii	Chryseobacterium nakagawai	Lactobacillus acidophilus	Candida metapsilosis	Human adenovirus 5
Acinetobacter nosocomialis	Actinomadura mexicana	Lactobacillus delbrueckii	Candida orthopsilosis	Human adenovirus 6
Acinetobacter pittii	Actinomadura latina	Lactobacillus helveticus	Candida dubliniensis	Human adenovirus 7
Actinobacillus equuli	Paraclostridium bifermentans	Lactobacillus gasseri	[Candida] haemuloni	Human adenovirus 57
Actinobacillus hominis	Anaerococcus hydrogenalis	Lactobacillus amylovorus	[Candida] auris	Human adenovirus 11
Actinobacillus lignieresii	Tsukamurella conjunctivitidis	Lactobacillus johnsonii	Clavispora lusitaniae	Human adenovirus 14
Actinobacillus minor	Obesumbacterium proteus	Lactobacillus crispatus	Cladophialophora bantiana	Human adenovirus 21
Actinobacillus pleuropneumoniae	Actinomadura meyerae	Lactobacillus jensenii	Coccidioides immitis	Human adenovirus 31
Actinobacillus succinogenes	Actinomadura chibensis	Lactobacillus iners	Coccidioides posadasii	Human adenovirus 34
Actinobacillus suis	Aeromonas dhakensis	Lactobacillus kalixensis	Cokeromyces recurvatus	Human adenovirus 35
Actinobacillus ureae	Anaerococcus lactolyticus	Lactobacillus ultunensis	Cokeromyces recurvatus	Human adenovirus 55
Actinokineospora enzanensis	Bartonella koehlerae	Lactobacillus taiwanensis	Corynespora cassiicola	Primate erythroparvovirus 1
Actinomadura madurae	Elizabethkingia bruuniana	Lactococcus cremoris	Cryptococcus neoformans	Orf virus
Actinomadura pelletieri	Borreliella mayonii	Lactococcus garvieae	Cryptococcus gattii VGI	Molluscum contagiosum virus
Actinomyces bovis	Gordonia rubripertincta	Lactococcus lactis	Cryptococcus gattii VGIII	Betapolyomavirus hominis
Actinomyces gerencseriae	Neisseria polysaccharea	Leclercia adecarboxylata	Cryptococcus gattii VGII	JC polyomavirus
Actinomyces graevenitzii	Achromobacter spanius	Legionella bozemanae	Cryptococcus gattii VGIV	WU Polyomavirus
Actinomyces israelii	Streptococcus macedonicus	Legionella longbeachae	Cunninghamella bertholletiae	Betapolyomavirus tertihominis
Actinomyces johnsonii	Pantoea conspicua	Legionella maceachernii	Curvularia lunata	Human papillomavirus type 16
Actinomyces massiliensis	Mycobacterium lepromatosis	Legionella pneumophila	Cutaneotrichosporon cutaneum	Suid alphaherpesvirus 1
Actinomyces naeslundii	Borreliella afzelii	Legionella pneumophila serogroup 1	Cutaneotrichosporon mucoides	Macacine alphaherpesvirus 1
Actinomyces oricola	Burkholderia thailandensis	Legionella waltersii	Debaryomyces hansenii	Hepatitis B virus genotype B
Actinomyces oris	Gemella bergeri	Leptospira alexanderi	Diutina rugosa	hepatitis B virus genotype C
Actinomyces radicidentis	Streptococcus lutetiensis	Leptospira alstonii	Emergomyces orientalis	Hepatitis B virus
Actinomyces ruminicola	Prevotella nigrescens	Leptospira biflexa	Emergomyces africanus	Vaccinia virus
Actinomyces timonensis	Rickettsia australis	Leptospira borgpetersenii	Emergomyces canadensis	Human mastadenovirus A
Actinomyces urogenitalis	Eikenella exigua	Leptospira borgpetersenii serovar Ballum	Emergomyces europaeus	Human mastadenovirus B
Actinomyces viscosus	Nocardia gipuzkoensis	Leptospira borgpetersenii serovar Pomona	Emergomyces pasteurianus	Human mastadenovirus C
Actinomyces dentalis	Nocardia barduliensis	Leptospira broomii	Emmonsia crescens	Human mastadenovirus E
Aerococcus urinae	Enterobacter quasihormaechei	Leptospira fainei	Emmonsiellopsis terrestris	Human bocavirus 1
Aerococcus viridans	Francisella hispaniensis	Leptospira inadai	Emmonsiellopsis coralliformis	Human bocavirus 2
Aeromonas bestiarum	Kocuria rhizophila	Leptospira interrogans	Exophiala dermatitidis	Human bocavirus 3
Aeromonas caviae	Rickettsia massiliae	Leptospira interrogans serovar Autumnalis	Fusarium solani	Human bocavirus 4 NI
Aeromonas encheleia	Rickettsia slovaca	Leptospira interrogans serovar Bataviae	Fusarium oxysporum	Primate erythroparvovirus 4
Aeromonas enteropelogenes	Rickettsia amblyommatis	Leptospira interrogans serovar Canicola	Fusarium fujikuroi	Betapolyomavirus secuhominis
Aeromonas eucrenophila	Gordonia hongkongensis	Leptospira interrogans serovar Grippotyphosa	Fusarium verticillioides	Molluscum contagiosum virus subtype 1
Aeromonas hydrophila	Prevotella maculosa	Leptospira interrogans serovar Icterohaemorrhagiae	Fusarium proliferatum	Pig-tailed macaque parvovirus
Aeromonas jandaei	Mycolicibacterium conceptionense	Leptospira interrogans serovar Pyrogenes	Fusarium graminearum	Human bocavirus
Aeromonas media	Schaalia georgiae	Leptospira kirschneri	Fusarium sambucinum	Alphatorquevirus
Aeromonas molluscorum	Prevotella enoeca	Leptospira kmetyi	Fusarium sporotrichioides	Torque teno virus 1
Aeromonas popoffii	Haemophilus quentini	Leptospira licerasiae	Fusarium culmorum	Torque teno virus 2
Aeromonas salmonicida	Rickettsia japonica	Leptospira mayottensis	Fusarium poae	Torque teno virus 3
Aeromonas schubertii	Rickettsia parkeri	Leptospira meyeri	Fusarium avenaceum	Torque teno virus 4
Aeromonas simiae	Rickettsia sibirica	Leptospira noguchii	Fusarium udum	Torque teno virus 5
Aeromonas sobria	Burkholderia oklahomensis	Leptospira santarosai	Fusarium nygamai	Torque teno virus 6
Aeromonas veronii	Streptococcus vestibularis	Leptospira terpstrae	Fusarium circinatum	Torque teno virus 7
Aeromonas veronii bv. veronii	Rickettsia helvetica	Leptospira vanthielii	Fusarium equiseti	Torque teno virus 8
Aeromonas veronii bv. sobria	Rickettsia akari	Leptospira weilii	Fusarium tricinctum	Torque teno virus 9
Aggregatibacter actinomycetemcomitans	Pseudomonas fulva	Leptospira wolbachii	Fusarium pseudograminearum	Torque teno virus 10
Aggregatibacter aphrophilus	Rickettsia honei	Leptospira wolffii	Fusarium hostae	Torque teno virus 11
Aggregatibacter segnis	Pantoea brenneri	Leptospira yanagawae	Fusarium langsethiae	Torque teno virus 12
Aggregatibacter sp. oral taxon 458	Rickettsia monacensis	Leptotrichia buccalis	Fusarium mangiferae	Torque teno virus 13
Agrobacterium tumefaciens	Rickettsia tamurae	Listeria grayi	Fusarium asiaticum	Torque teno virus 14
Alcaligenes faecalis	Chryseobacterium oranimense	Listeria innocua	Fusarium meridionale	Torque teno virus 15
Aliarcobacter cryaerophilus	Prevotella vespertina	Listeria ivanovii	Fusarium temperatum	Torque teno virus 16
Alistipes finegoldii	Prevotella oris	Listeria seeligeri	Fusarium euwallaceae	Torque teno virus 17
Alkalihalobacillus algicola	Prevotella aurantiaca	Listeria welshimeri	Fusarium pininemorale	Torque teno virus 18
Amedibacillus dolichus	Haemophilus paraphrohaemolyticus	Listeria monocytogenes	Fusarium agapanthi	Torque teno virus 19
Anaerococcus prevotii	Haemophilus sputorum	Metamycoplasma hominis	Fusarium praegraminearum	Torque teno virus 20
Anaerococcus tetradius	Prevotella buccalis	Metamycoplasma salivarium	Histoplasma capsulatum	Torque teno virus 21
Anaplasma phagocytophilum	Prevotella timonensis	Micrococcus luteus	Kluyveromyces marxianus	Torque teno virus 22
Arcanobacterium haemolyticum	Veillonella denticariosi	Micrococcus lylae	Kodamaea ohmeri	Torque teno virus 23
Bacillus anthracis	Borreliella americana	Moraxella atlantae	[Candida] zeylanoides	Torque teno virus 24
Bacillus cereus	Prevotella scopos	Moraxella canis	Lichtheimia corymbifera	Torque teno virus 25
Bacillus subtilis	Klebsiella grimontii	Moraxella lacunata	Lichtheimia hyalospora	Torque teno virus 26
Bacillus thuringiensis	Delftia tsuruhatensis	Moraxella nonliquefaciens	Lichtheimia ramosa	Torque teno virus 27
Bacteroides fragilis	Gordonia terrae	Moraxella osloensis	Lomentospora prolificans	Torque teno virus 28
Bacteroides ovatus	Prevotella fusca	Moraxella catarrhalis	Lomentospora prolificans	Torque teno virus 29
Bacteroides thetaiotaomicron	Aeromonas sanarellii	Morganella morganii	Malassezia globosa	Torque teno virus
Bartonella elizabethae	Burkholderia territorii	Mycobacterium leprae	Malassezia pachydermatis	Seal parapoxvirus
Bartonella henselae	Sphingomonas koreensis	Mycobacterium gordonae	Meyerozyma guilliermondii	Cowpox virus
Bartonella quintana	Pseudomonas japonica	Mycobacterium haemophilum	Mucor indicus	Buffalopox virus
Bartonella vinsonii	Klebsiella pasteurii	Mycobacterium kansasii	Mucor racemosus	Variola virus
Bartonella bacilliformis	Bacillus mycoides	Mycobacterium malmoense	Mucor circinelloides	Monkeypox virus
Bifidobacterium coryneforme	Kocuria salsicia	Mycobacterium scrofulaceum	Mucor irregularis	Pseudocowpox virus
Blautia producta	Streptococcus thermophilus	Mycobacterium xenopi	Naganishia albida	Mastadenovirus
Bordetella avium	Mycobacterium heckeshornense	Mycobacterium porcinum	[Candida] glabrata	Human adenovirus 12
Bordetella hinzii	Delftia lacustris	Mycobacterium suricattae	Papiliotrema laurentii	Bovine papular stomatitis virus
Bordetella holmesii	Borrelia hispanica	Mycobacterium senegalense	Paracoccidioides brasiliensis	Human adenovirus 32
Bordetella bronchialis	Mycolicibacterium phlei	Mycobacterium goodii	Phaeoacremonium parasiticum	Human adenovirus 36
Bordetella bronchiseptica	Aeromonas taiwanensis	Mycobacterium lacticola	Phialophora verrucosa	Human adenovirus 18
Bordetella flabilis	Kosakonia cowanii	Mycobacterium alsense	Pichia kudriavzevii	Human adenovirus 20
Bordetella parapertussis	Staphylococcus argenteus	Mycobacterium angelicum	Pleurostoma richardsiae	Human adenovirus D37
Bordetella pertussis	Bacteroides faecis	Mycobacterium asiaticum	Pneumocystis jirovecii	Human adenovirus 19
Bordetella petrii	Proteus faecis	Mycobacterium bohemicum	Pneumocystis wakefieldiae	Human adenovirus 47
Bordetella trematum	Citrobacter farmeri	Mycobacterium branderi	Rhizomucor pusillus	Human adenovirus D13
Borrelia duttonii	Citrobacter youngae	Mycobacterium celatum	Rhizomucor miehei	Human adenovirus 25
Borrelia recurrentis	Mycobacterium kyorinense	Mycobacterium conspicuum	Rhizopus arrhizus	Human adenovirus 27
Borreliella burgdorferi	Mycobacterium koreense	Mycobacterium europaeum	Rhizopus microsporus	Human adenovirus 46
Borreliella garinii	Mycobacterium noviomagense	Mycobacterium florentinum	Rhizopus delemar	Human adenovirus 15
Brucella abortus	Gordonia polyisoprenivorans	Mycobacterium genavense	Rhizopus stolonifer	Human adenovirus 22
Brucella melitensis	Escherichia albertii	Mycobacterium heidelbergense	Rhodotorula mucilaginosa	Human adenovirus 17
Brucella suis	Streptococcus pseudoporcinus	Mycobacterium heraklionense	Scedosporium apiospermum	Human adenovirus 30
Brucella canis	Pantoea septica	Mycobacterium intermedium	Scedosporium boydii	Human adenovirus 51
Brucella intermedia	Siccibacter turicensis	Mycobacterium lentiflavum	Scedosporium dehoogii	Human adenovirus 29
Brucella anthropi	Aeromonas tecta	Mycobacterium lepraemurium	Schizophyllum commune	Human adenovirus 26
Brucella haematophila	Mycobacterium gastri	Mycobacterium paraense	Scopulariopsis brevicaulis	Human adenovirus 23
Brucella pseudintermedia	Burkholderia ubonensis	Mycobacterium paragordonae	[Candida] sake	Human adenovirus D8
Bulleidia extructa	Mycobacterium fragae	Mycobacterium parascrofulaceum	Sporothrix schenckii	Human adenovirus 39
Burkholderia gladioli	Staphylococcus borealis	Mycobacterium paraterrae	Sporothrix globosa	Human adenovirus D10
Burkholderia mallei	Cedecea neteri	Mycobacterium parmense	Sporothrix brasiliensis	Human adenovirus 48
Burkholderia pseudomallei	Cedecea lapagei	Mycobacterium pseudoshottsii	Sporothrix mexicana	Human adenovirus 49
Burkholderia cepacia complex	Pseudomonas yangonensis	Mycobacterium riyadhense	Sporothrix luriei	Human adenovirus 44
Burkholderia ambifaria	Fusobacterium periodonticum	Mycobacterium sherrisii	Syncephalastrum racemosum	Human adenovirus 45
Burkholderia anthina	Salmonella bongori	Mycobacterium shigaense	Syncephalastrum monosporum	Human adenovirus 33
Burkholderia arboris	Yersinia canariae	Mycobacterium shimoidei	Talaromyces marneffei	Human adenovirus 43
Burkholderia cenocepacia	Yokenella regensburgei	Mycobacterium shinjukuense	Trichoderma viride	Human adenovirus 38
Burkholderia cepacia	Scandinavium goeteborgense	Mycobacterium shottsii	Trichosporon asahii	Human adenovirus 42
Burkholderia contaminans	Franconibacter helveticus	Mycobacterium stomatepiae	Trichosporon ovoides	Human adenovirus 28
Burkholderia diffusa	Shimwellia blattae	Mycobacterium szulgai	Trichosporon asteroides	Human adenovirus 24
Burkholderia dolosa	Mycolicibacterium aurum	Mycobacterium triplex	Wickerhamomyces anomalus	Human polyomavirus 6
Burkholderia lata	Gordonia otitidis	Mycobacterium virginiense	[Candida] aaseri	Human polyomavirus 7
Burkholderia latens	Citrobacter pasteurii	Mycobacterium interjectum	Yarrowia lipolytica	tanapox virus
Burkholderia metallica	Francisella opportunistica	Mycobacterium simiae	Trichoderma virens	Yaba monkey tumor virus
Burkholderia multivorans	Nocardia neocaledoniensis	Mycobacterium marinum	Aspergillus fischeri	Trichodysplasia spinulosa-associated polyomavirus
Burkholderia pseudomultivorans	Rickettsia canadensis	Mycobacterium ulcerans	Aspergillus quadrilineatus	Saint Louis polyomavirus
Burkholderia pyrrocinia	Pseudomonas cannabina	Mycobacterium avium complex (MAC)	Fusarium falciforme	MW polyomavirus
Burkholderia seminalis	Streptococcus canis	Mycobacterium intracellulare	Malassezia caprae	Merkel cell polyomavirus
Burkholderia stabilis	Brucella oryzae	Mycobacterium avium	Cutaneotrichosporon oleaginosum	Porcine circovirus 2
Burkholderia stagnalis	Legionella cincinnatiensis	Mycobacterium arosiense	Fusarium keratoplasticum	Porcine circovirus 1
Burkholderia vietnamiensis	Cedecea davisae	Mycobacterium avium subsp. avium	Aspergillus sojae	Human papillomavirus 49
Campylobacter coli	Eikenella longinqua	Mycobacterium avium subsp. hominissuis	Aspergillus fumigatiaffinis	Human papillomavirus 92
Campylobacter concisus	Corynebacterium simulans	Mycobacterium avium subsp. silvaticum	Aspergillus lentulus	Human papillomavirus 96
Campylobacter fetus	Bartonella taylorii	Mycobacterium avium subsp. paratuberculosis	Aspergillus arachidicola	Betapapillomavirus 1
Campylobacter hyointestinalis	Mycobacterium mantenii	Mycobacterium bouchedurhonense	Aspergillus parasiticus	Betapapillomavirus 2
Campylobacter jejuni	Mycolicibacterium thermoresistibile	Mycobacterium intracellulare subsp. chimaera	Aspergillus novofumigatus	Human papillomavirus 41
Campylobacter jejuni subsp. jejuni	Mycobacterium holsaticum	Mycobacterium colombiense	Trichosporon inkin	Human papillomavirus 63
Campylobacter lari	Lelliottia amnigena	Mycobacterium marseillense	Chrysosporium queenslandicum	Human papillomavirus 26
Campylobacter sputorum	Sarcina ventriculi	Mycobacterium paraintracellulare	Malassezia sympodialis	Human papillomavirus 32
Campylobacter upsaliensis	Mycolicibacterium chubuense	Mycobacterium timonense	Fusarium vanettenii	Human papillomavirus 34
Neoehrlichia mikurensis	Pandoraea fibrosis	Mycobacterium vulneris	Cladophialophora psammophila	Human papillomavirus 53
Capnocytophaga gingivalis	Clostridium chauvoei	Mycobacterium intracellulare subsp. yongonense	Malassezia equina	Human papillomavirus 7
Capnocytophaga haemolytica	Bartonella birtlesii	Mycobacterium tuberculosis complex	Malassezia nana	Human papillomavirus 90
Capnocytophaga leadbetteri	Pseudomonas protegens	Mycobacterium tuberculosis variant bovis BCG	Blastomyces silverae	Gammapapillomavirus 16
Capnocytophaga ochracea	Pseudomonas veronii	Mycobacterium tuberculosis variant bovis	Aspergillus viridinutans	Gammapapillomavirus 14
Capnocytophaga cynodegmi	Pseudomonas poae	Mycobacterium tuberculosis	Fusarium neocosmosporiellum	Gammapapillomavirus 5
Capnocytophaga sputigena	Cutibacterium namnetense	Mycobacterium tuberculosis variant africanum	Blastomyces percursus	Gammapapillomavirus 8
Cardiobacterium hominis	Legionella parisiensis	Mycobacterium canettii	Aspergillus udagawae	Gammapapillomavirus 7
Cardiobacterium valvarum	Citrobacter werkmanii	Mycobacterium tuberculosis variant caprae	Aspergillus luchuensis	Gammapapillomavirus 11
Chlamydia pneumoniae	Mycolicibacterium hassiacum	Mycobacterium tuberculosis variant microti	Aspergillus tubingensis	Gammapapillomavirus 13
Chlamydia abortus	Mycolicibacterium chlorophenolicum	Mycobacterium mungi	Malassezia dermatis	Gammapapillomavirus 15
Chlamydia psittaci	Mycolicibacterium flavescens	Mycobacterium orygis	Fusarium subglutinans	Gammapapillomavirus 6
Chlamydia trachomatis	Bartonella doshiae	Mycobacterium tuberculosis variant pinnipedii	Fusarium thapsinum	Gammapapillomavirus 10
Chromobacterium aquaticum	Pantoea ananatis	Mycobacteroides chelonae	Malassezia furfur	Astrovirus MLB2
Chromobacterium haemolyticum	Buttiauxella ferragutiae	Mycobacteroides immunogenum	Aspergillus brasiliensis	Influenza A virus
Chromobacterium violaceum	Ewingella americana	Mycobacteroides salmoniphilum	Aspergillus thermomutatus	Influenza A virus
Chryseobacterium gleum	Bartonella tribocorum	Mycobacteroides franklinii	Aspergillus sydowii	Rotavirus A
Chryseobacterium indologenes	Acinetobacter variabilis	Mycobacteroides saopaulense	Aspergillus turcosus	Rotavirus B
Citrobacter amalonaticus	Nocardia blacklockiae	Mycobacteroides abscessus	Malassezia obtusa	Rotavirus C
Citrobacter koseri	Mycolicibacterium obuense	Mycobacteroides abscessus subsp. abscessus	Trichosporon coremiiforme	H1N1 subtype
Citrobacter braakii	Gordonia effusa	Mycobacteroides abscessus subsp. bolletii	Meyerozyma carpophila	H2N2 subtype
Citrobacter freundii	Gordonia amarae	Mycobacteroides abscessus subsp. massiliense	Malassezia japonica	H10N8 subtype
Clostridioides difficile	Mycobacterium nebraskense	Mycolicibacter algericus	Malassezia cuniculi	H7N9 subtype
Clostridium argentinense	Bartonella grahamii	Mycolicibacter arupensis	Scedosporium aurantiacum	Eastern equine encephalitis virus
Clostridium baratii	Ralstonia insidiosa	Mycolicibacter kumamotonensis	Aspergillus bombycis	Venezuelan equine encephalitis virus
Clostridium beijerinckii	Neisseria perflava	Mycolicibacter longobardus	Apiotrichum porosum	Western equine encephalitis virus
Clostridium botulinum	Yersinia mollaretii	Mycolicibacter nonchromogenicus	Cunninghamella echinulata	Rubella virus
Clostridium butyricum	Francisella philomiragia	Mycolicibacterium fortuitum	Trichosporon faecale	Chikungunya virus
Clostridium cadaveris	Mycobacterium grossiae	Mycolicibacterium vaccae	Pascua guehoae	Japanese encephalitis virus
Clostridium carnis	Mycolicibacterium llatzerense	Mycolicibacterium peregrinum	Aspergillus nomiae	West Nile virus
Clostridium cochlearium	Legionella santicrucis	Mycolicibacterium setense	Saksenaea oblongispora	Middelburg virus
Clostridium disporicum	Buttiauxella gaviniae	Mycolicibacterium septicum	Phycomyces blakesleeanus	Semliki Forest virus
Clostridium fallax	Erwinia billingiae	Mycolicibacterium houstonense	Talaromyces verruculosus	Zika virus
Clostridium haemolyticum	Erwinia gerundensis	Mycolicibacterium neworleansense	Talaromyces pinophilus	Mucambo virus
Clostridium intestinale	Hafnia paralvei	Mycolicibacterium aubagnense	Talaromyces amestolkiae	Dabie bandavirus
[Clostridium] leptum	Bartonella alsatica	Mycolicibacterium smegmatis	Aspergillus glaucus	Betacoronavirus 1
Clostridium malenominatum	Acinetobacter schindleri	Mycolicibacterium canariasense	Candida sojae	Influenza B virus (B/Victoria/02/1987)
Clostridium neonatale	Neisseria flava	Mycolicibacterium cosmeticum	Aspergillus carbonarius	Influenza B virus (B/Yamagata/115/2003)
Clostridium nitritogenes	Capnocytophaga canimorsus	Mycolicibacterium monacense	Alternaria arborescens	Influenza B virus (B/Lee/1940)
Clostridium novyi	Yersinia rohdei	Mycolicibacterium bacteremicum	Wickerhamomyces ciferrii	Colorado tick fever virus
Clostridium novyi A	Morococcus cerebrosus	Mycolicibacterium wolinskyi	Talaromyces stipitatus	Poliovirus 1
Clostridium paraputrificum	Mycobacterium paraffinicum	Mycolicibacterium brumae	Alternaria infectoria	Measles morbillivirus
Clostridium putrefaciens	Chlamydia caviae	Mycolicibacterium celeriflavum	Pneumocystis murina	enterovirus D70
Clostridium sardiniense	Chlamydia felis	Mycolicibacterium elephantis	Aspergillus alliaceus	Echovirus E19
Clostridium septicum	Buttiauxella brennerae	Mycolicibacterium iranicum	Pneumocystis carinii	Enterovirus B69
Clostridium sp. SY8519	Rouxiella chamberiensis	Mycolicibacterium moriokaense	Aspergillus hancockii	Coxsackievirus A1
Clostridium sporogenes	Mycobacterium palustre	Mycobacterium doricum	Sporothrix pallida	Coxsackievirus B6
[Clostridium] sporosphaeroides	Mycobacterium seoulense	Mycolicibacterium tusciae	Mucor velutinosus	Enterovirus
Clostridium subterminale	Bartonella rattaustraliani	Mycolicibacterium boenickei	Mucor ambiguus	Coxsackievirus A10
Clostridium tertium	Dermacoccus nishinomiyaensis	Mycolicibacterium brisbanense	Ilyonectria destructans	Echovirus E18
Clostridium tetani	Williamsia serinedens	Mycolicibacterium mageritense	Aspergillus aculeatus	Echovirus E30
Clostridium perfringens	Mycobacterium paraseoulense	Mycolicibacterium mucogenicum	Aspergillus avenaceus	Saint Louis encephalitis virus
Clostridium combesii	Nocardia amikacinitolerans	Mycolicibacterium neoaurum	Aspergillus taichungensis	Powassan virus
Clostridium moniliforme	Nocardiopsis dassonvillei	Mycoplasma genitalium	Nakaseomyces delphensis	Tick-borne encephalitis virus
Collinsella aerofaciens	Williamsia deligens	Mycoplasma pneumoniae	Aspergillus westerdijkiae	Murray Valley encephalitis virus
Corynebacterium accolens	Dietzia maris	Neisseria gonorrhoeae	Aspergillus ochraceus	Dengue virus
Corynebacterium minutissimum	Saccharopolyspora rosea	Neisseria meningitidis	Absidia repens	Echovirus E9
Corynebacterium propinquum	Kluyvera cryocrescens	Neisseria cinerea	Nosema bombycis	Kunjin virus
Corynebacterium xerosis	Bacteroides caccae	Neisseria flavescens	Purpureocillium lilacinum	Louping ill virus
Corynebacterium diphtheriae	Enterobacter bugandensis	Neisseria lactamica	Aspergillus ochraceoroseus	Echovirus E6
Corynebacterium jeikeium	Sodalis praecaptivus	Neisseria macacae	Aspergillus sclerotiorum	Coxsackievirus A9
Corynebacterium kroppenstedtii	Francisella noatunensis	Neisseria mucosa	Aspergillus steynii	Coxsackievirus B1
Corynebacterium pseudodiphtheriticum	Bartonella melophagi	Neisseria sicca	Aspergillus persii	Coxsackievirus B3
Corynebacterium pseudotuberculosis	Yersinia bercovieri	Neisseria subflava	Aspergillus ustus	Coxsackievirus B5
Corynebacterium striatum	Moraxella lincolnii	Neisseria wadsworthii	Aspergillus tritici	Coxsackievirus A16
Corynebacterium ulcerans	Legionella brunensis	Neorickettsia sennetsu	Aspergillus campestris	Enterovirus A71
Corynebacterium urealyticum	Vibrio harveyi	Nocardia abscessus	Aspergillus clavatus	Echovirus E25
Coxiella burnetii	Mycobacterium saskatchewanense	Nocardia arthritidis	Debaryomyces fabryi	Echovirus E16
Cronobacter sakazakii	Mycolicibacterium novocastrense	Nocardia asteroides	Aspergillus unguis	Echovirus E17
Cronobacter dublinensis	Streptococcus sinensis	Nocardia beijingensis	Lodderomyces elongisporus	Omsk hemorrhagic fever virus
Cronobacter malonaticus	Photorhabdus asymbiotica	Nocardia brasiliensis	Aspergillus rambellii	Coxsackievirus A6
Cronobacter muytjensii	Mycobacterium kubicae	Nocardia cyriacigeorgica	Penicillium capsulatum	Coxsackievirus B4
Cronobacter turicensis	Streptococcus gordonii	Nocardia farcinica	Aspergillus pseudoglaucus	Enterovirus C
Cronobacter universalis	Enterobacter wuhouensis	Nocardia nova	Aspergillus candidus	Usutu virus
Cutibacterium acnes	Burkholderia glumae	Nocardia otitidiscaviarum	Acanthamoeba castellanii	Coxsackievirus A2
Cutibacterium avidum	Streptococcus cristatus	Nocardia transvalensis	Amoeba	Rocio virus
Delftia acidovorans	Mycobacterium lacus	Nocardia veterana	Ancylostoma duodenale	Coxsackievirus A4
Dialister pneumosintes	Nocardia colli	Nocardia wallacei	Angiostrongylus cantonensis	Coxsackievirus A5
Dolosigranulum pigrum	Enterobacter huaxiensis	Nocardia asiatica	Ascaris lumbricoides	Coxsackievirus A7
Edwardsiella tarda	Bartonella bovis	Nocardia puris	Babesia cf. divergens	Coxsackievirus A8
Edwardsiella ictaluri	Streptococcus ratti	Nocardia acidivorans	Babesia microti	enterovirus D68
Edwardsiella hoshinae	Legionella norrlandica	Nocardia africana	Balamuthia mandrillaris	Echovirus E3
Eggerthella lenta	Bartonella schoenbuchensis	Nocardia alba	Baylisascaris procyonis	Coxsackievirus B2
Ehrlichia chaffeensis	Neisseria elongata	Nocardia amamiensis	Clonorchis sinensis	Enterovirus A
Ehrlichia canis	Cutibacterium modestum	Nocardia anaemiae	Cryptosporidium parvum	Enterovirus B
Eikenella corrodens	Peptostreptococcus stomatis	Nocardia aobensis	Cryptosporidium hominis	Enterovirus D
Eikenella halliae	Staphylococcus saccharolyticus	Nocardia araoensis	Cyclospora cayetanensis	Rhinovirus A
Elizabethkingia anophelis	Corynebacterium aurimucosum	Nocardia arizonensis	Dibothriocephalus latus	Rhinovirus B
Elizabethkingia meningoseptica	Staphylococcus simiae	Nocardia brevicatena	Dibothriocephalus nihonkaiensis	Rhinovirus C
Elizabethkingia miricola	Streptococcus parasanguinis	Nocardia caishijiensis	Dientamoeba fragilis	Nipah henipavirus
Enterobacter mori	Acinetobacter radioresistens	Nocardia carnea	Echinococcus granulosus	Human parechovirus 1
Enterobacter hormaechei subsp. xiangfangensis	Acinetobacter guillouiae	Nocardia cerradoensis	Echinococcus multilocularis	Human parechovirus 3
[Eubacterium] brachy	Bartonella clarridgeiae	Nocardia concava	Entamoeba histolytica	Parechovirus A
[Eubacterium] nodatum	Nocardia donostiensis	Nocardia coubleae	Enterobius vermicularis	Hendra henipavirus
Enterobacter cloacae complex	Streptococcus massiliensis	Nocardia crassostreae	Fasciola hepatica	Human immunodeficiency virus 1
Enterobacter asburiae	Acinetobacter septicus	Nocardia elegans	Fasciolopsis buski	Human T-cell leukemia virus type I
Enterobacter cloacae subsp. dissolvens	Acinetobacter ursingii	Nocardia exalbida	Gnathostoma spinigerum	Human T-lymphotropic virus 2
Enterobacter hormaechei	Bartonella rochalimae	Nocardia flavorosea	Rodentolepis nana	Human metapneumovirus
Enterobacter hormaechei subsp. hoffmannii	Streptococcus lactarius	Nocardia fusca	Leishmania donovani	Ebola virus
Enterobacter cloacae	Nocardia ninae	Nocardia gamkensis	Naegleria fowleri	Human respirovirus 3
Enterobacter kobei	Moraxella ovis	Nocardia grenadensis	Necator americanus	Human respirovirus 1
Enterobacter ludwigii	Streptococcus uberis	Nocardia harenae	Paragonimus westermani	Human immunodeficiency virus 2
Enterobacter roggenkampii	Streptococcus hongkongensis	Nocardia higoensis	Plasmodium falciparum	Simian immunodeficiency virus
Enterobacter sichuanensis	Acinetobacter parvus	Nocardia ignorata	Plasmodium vivax	Influenza A virus (A/goose/Guangdong/1/1996(H5N1))
Enterobacter cancerogenus	Acinetobacter baylyi	Nocardia inohanensis	Plasmodium malariae	Lyssavirus rabies
Enterobacter chengduensis	Yersinia ruckeri	Nocardia jejuensis	Plasmodium knowlesi	Lyssavirus australis
Enterobacter chuandaensis	Vibrio anguillarum	Nocardia jiangxiensis	Plasmodium ovale	Lassa mammarenavirus
Enterococcus avium	Legionella clemsonensis	Nocardia kruczakiae	Schistosoma japonicum	Parechovirus C
Enterococcus gilvus	Mycoplasmopsis arginini	Nocardia lijiangensis	Schistosoma mansoni	Influenza A virus (A/New York/392/2004(H3N2))
Enterococcus hirae	Mycobacterium basiliense	Nocardia mexicana	Strongyloides stercoralis	Influenza B virus
Enterococcus durans	Vibrio navarrensis	Nocardia mikamii	Taenia solium	Influenza C virus
Enterococcus casseliflavus	Vibrio furnissii	Nocardia miyunensis	Taenia saginata	Norovirus
Enterococcus faecalis	Streptococcus iniae	Nocardia niigatensis	Toxoplasma gondii	La Crosse virus
Enterococcus faecium	Streptococcus thoraltensis	Nocardia niwae	Trichinella spiralis	Human coronavirus 229E
Enterococcus gallinarum	Streptococcus pluranimalium	Nocardia paucivorans	Trichuris trichiura	Human coronavirus NL63
Erysipelothrix tonsillarum	Neisseria dumasiana	Nocardia pneumoniae	Trypanosoma brucei	Human coronavirus HKU1
Erysipelothrix rhusiopathiae	Vibrio cidicii	Nocardia pseudobrasiliensis	Trypanosoma cruzi	Orthobunyavirus
Escherichia fergusonii	Streptococcus macacae	Nocardia pseudovaccinii	Wuchereria bancrofti	Severe acute respiratory syndrome-related coronavirus
Escherichia coli	Streptococcus halichoeri	Nocardia rhamnosiphila	Taenia asiatica	Severe acute respiratory syndrome coronavirus 2
Eubacterium callanderi	Streptococcus infantis	Nocardia salmonicida	Taenia multiceps	Severe acute respiratory syndrome coronavirus
Eubacterium limosum	Citrobacter rodentium	Nocardia salmonicida subsp. cummidelens	Leishmania aethiopica	Middle East respiratory syndrome-related coronavirus
Faecalicatena contorta	Neisseria bacilliformis	Nocardia salmonicida subsp. cummidelens NBRC 100378	Leishmania major	California encephalitis virus
Finegoldia magna	Pseudomonas citronellolis	Nocardia seriolae	Leishmania mexicana	Lymphocytic choriomeningitis mammarenavirus
Fluoribacter dumoffii	Vibrio cincinnatiensis	Nocardia shimofusensis	Leishmania amazonensis	Human orthopneumovirus
Francisella tularensis	Streptococcus sobrinus	Nocardia sienata	Leishmania panamensis	Human respiratory syncytial virus A
Fusobacterium necrophorum	Streptococcus acidominimus	Nocardia speluncae	Leishmania braziliensis	Human respiratory syncytial virus B
Fusobacterium nucleatum	Streptococcus gallinaceus	Nocardia takedensis	Trypanosoma evansi	Hantaan orthohantavirus
Gardnerella vaginalis	Streptococcus minor	Nocardia tenerifensis	Cryptosporidium meleagridis	Seoul orthohantavirus
Gemella haemolysans	Streptococcus devriesei	Nocardia terpenica	Trichinella murrelli	Crimean-Congo hemorrhagic fever orthonairovirus
Gemella morbillorum	Citrobacter sedlakii	Nocardia testacea	Onchocerca volvulus	Mumps orthorubulavirus
Gordonia bronchialis	Staphylococcus succinus	Nocardia thailandica		Human orthorubulavirus 2
Gordonia aichiensis	Streptococcus peroris	Nocardia uniformis		Human orthorubulavirus 4
Gordonia araii	Pseudomonas otitidis	Nocardia vaccinii		Severe fever with thrombocytopenia syndrome virus
Gordonia sputi	Corynebacterium appendicis	Nocardia vermiculata		Oropouche virus
Granulicatella adiacens	Streptococcus ferus	Nocardia vinacea		Tensaw virus
Haemophilus parahaemolyticus	Streptococcus criceti	Nocardia violaceofusca		California encephalitis orthobunyavirus
Haemophilus parainfluenzae	Kosakonia quasisacchari	Nocardia vulneris		Parechovirus B
Haemophilus pittmaniae	Staphylococcus gallinarum	Nocardia xishanensis		Toscana virus
Haemophilus haemolyticus	Staphylococcus equorum	Nocardia yamanashiensis		Rift Valley fever virus
Haemophilus influenzae	Mycobacterium talmoniae	Nocardiopsis aegyptia		Vesiculovirus chandipura
Hafnia alvei	Staphylococcus arlettae	Nonomuraea africana		Hepatitis C virus genotype 7
Helicobacter pylori	Staphylococcus carnosus	Orientia tsutsugamushi		Hepatitis C virus genotype 4
Helicobacter acinonychis	Staphylococcus condimenti	Paeniclostridium sordellii		Hepatitis C virus genotype 5
Helicobacter aurati	Neisseria weaveri	Paeniclostridium ghonii		Hepatitis C virus genotype 3
Helicobacter bilis	Enterococcus haemoperoxidus	Pandoraea pulmonicola		Hepatitis C virus genotype 2
Helicobacter bizzozeronii	Enterococcus italicus	Pantoea agglomerans		Hepatitis C virus genotype 1
Helicobacter canadensis	Staphylococcus cornubiensis	Pantoea dispersa		Hepatitis C virus genotype 6
Helicobacter canis	Streptococcus hyovaginalis	Parvimonas micra		Rubivirus rubellae
Helicobacter cholecystus	Enterococcus mundtii	Pasteurella dagmatis		Primate T-lymphotropic virus 1
Helicobacter cinaedi	Staphylococcus schleiferi	Pasteurella multocida		Primate T-lymphotropic virus 2
Helicobacter felis	Staphylococcus agnetis	Pediococcus acidilactici		Norwalk virus
Helicobacter fennelliae	Staphylococcus auricularis	Peptoniphilus asaccharolyticus		Zaire ebolavirus
Helicobacter ganmani	Staphylococcus hyicus	Peptostreptococcus anaerobius		Ljungan virus M1146
Helicobacter heilmannii	Staphylococcus intermedius	Phocaeicola vulgatus		Dengue virus type 2
Helicobacter hepaticus	Streptococcus urinalis	Pluralibacter gergoviae		Human parainfluenza virus 4a
Helicobacter magdeburgensis	Staphylococcus pseudintermedius	[Enterobacter] lignolyticus		Chandipura virus
Helicobacter mesocricetorum	Staphylococcus delphini	Pluralibacter pyrinus		Sebokele virus 1
Helicobacter muridarum	Staphylococcus massiliensis	Porphyromonas gingivalis		Ljungan virus
Helicobacter mustelae	Enterococcus dispar	Porphyromonas levii		Poliovirus 2
Helicobacter pametensis	Acinetobacter soli	Porphyromonas asaccharolytica		Echovirus E20
Helicobacter pullorum	Pseudomonas oryzihabitans	Porphyromonas endodontalis		Echovirus E33
Helicobacter rappini	Stenotrophomonas acidaminiphila	Porphyromonas circumdentaria		Echovirus E2
Helicobacter rodentium	Enterococcus phoeniculicola	Porphyromonas cangingivalis		Echovirus E32
Helicobacter salomonis	Erysipelatoclostridium ramosum	Porphyromonas canoris		Enterovirus B73
Helicobacter trogontum	Streptomyces bikiniensis	Porphyromonas catoniae		Echovirus E5
Helicobacter typhlonius	Roseomonas gilardii	Porphyromonas gulae		Echovirus E11
Histophilus somni	Streptomyces globisporus	Porphyromonas gingivicanis		Enterovirus C116
Holdemanella biformis	Streptomyces thermovulgaris	Porphyromonas uenonis		Echovirus E21
Iodobacter fluviatilis	Streptomyces lanatus	Porphyromonas somerae		Enterovirus C113
Kingella kingae	Streptomyces corchorusii	Porphyromonas crevioricanis		Coxsackievirus A20
Kingella denitrificans	Bordetella ansorpii	Prescottella equi		Echovirus E24
Kingella oralis	Alloprevotella rava	Prevotella bivia		Echovirus E31
Kingella potus	Alloprevotella tannerae	Prevotella buccae		Echovirus E4
Prevotella disiens	Streptomyces cattleya			Coxsackievirus A12
Prevotella intermedia	Chryseobacterium mucoviscidosis			Coxsackievirus A17
Prevotella loescheii	Alysiella crassa			Poliovirus 3
Prevotella marshii	Streptomyces cacaoi			Echovirus E29
Prevotella melaninogenica	Clostridium celatum			Coxsackievirus A22
Prevotella oralis	Atlantibacter hermannii			enterovirus C102
Prevotella pleuritidis	Chryseobacterium balustinum			Coxsackievirus A19
Proteus myxofaciens	Moellerella wisconsensis			Enterovirus B82
Proteus penneri	Pantoea eucrina			Enterovirus B80
Proteus vulgaris	Inquilinus limosus			Coxsackievirus A24
Proteus mirabilis	Tatumella ptyseos			Coxsackievirus A13
Providencia rustigianii	Leminorella grimontii			Coxsackievirus A11
Providencia heimbachae	Cellulomonas hominis			Coxsackievirus A21
Providencia alcalifaciens	Bacillus cytotoxicus			Coxsackievirus A3
Providencia rettgeri	Pasteurella canis			Enterovirus A120
Providencia stuartii	Neisseria zoodegmatis			Echovirus E13
Pseudescherichia vulneris	Rhodococcus rhodnii			Coxsackievirus A14
Pseudomonas oleovorans	Filifactor alocis			Enterovirus C96
Pseudomonas alcaligenes	Agrobacterium pusense			Enterovirus C99
Pseudomonas fluorescens	Prevotella denticola			Enterovirus B85
Pseudomonas mendocina	Corynebacterium amycolatum			Echovirus E15
Pseudomonas mosselii				Enterovirus B83
Pseudomonas aeruginosa				Enterovirus A91
Pseudomonas putida				enterovirus D94
Pseudoramibacter alactolyticus				Enterovirus A121
Ralstonia mannitolilytica				Echovirus E7
Ralstonia pickettii				Enterovirus B81
Raoultella ornithinolytica				enterovirus D111
Raoultella planticola				rhinovirus A47
Raoultella terrigena				rhinovirus A49
Rhodococcus corynebacterioides				rhinovirus A82
Rhodococcus erythropolis				rhinovirus A39
Rhodococcus fascians				Enterovirus B75
Rhodococcus globerulus				Enterovirus B98
Rhodococcus gordoniae				Enterovirus B100
Rhodococcus jostii				Enterovirus A89
Rhodococcus pyridinivorans				Enterovirus B87
Rhodococcus rhodochrous				rhinovirus A36
Rickettsia aeschlimannii				Echovirus E14
Rickettsia africae				Echovirus E26
Rickettsia conorii				Echovirus E27
Rickettsia felis				Enterovirus B111
Rickettsia typhi				Enterovirus B106
Rickettsia prowazekii				enterovirus B79
Rickettsia rickettsii				Echovirus E12
Riemerella anatipestifer				Enterovirus B101
Rodentibacter pneumotropicus				Enterovirus B86
Roseomonas mucosa				Enterovirus B93
Rothia mucilaginosa				Enterovirus A90
Salmonella enterica				Enterovirus B77
Salmonella enterica subsp. enterica serovar Enteritidis				Enterovirus A76
Salmonella enterica subsp. enterica serovar Paratyphi A				Enterovirus B74
Salmonella enterica subsp. enterica serovar Paratyphi B				Enterovirus B84
Salmonella enterica subsp. enterica serovar Paratyphi C				enterovirus A114
Salmonella enterica subsp. enterica serovar Typhimurium				rhinovirus A46
Salmonella enterica subsp. enterica serovar Newport				rhinovirus A21
Schaalia odontolytica				rhinovirus A60
Schaalia vaccimaxillae				rhinovirus B14
Schaalia funkei				rhinovirus B17
Schaalia meyeri				rhinovirus B91
Schaalia turicensis				Enterovirus B88
Serratia marcescens				Rhinovirus B69
Serratia entomophila				rhinovirus B52
Serratia ficaria				Rhinovirus B48
Serratia fonticola				rhinovirus B86
Serratia grimesii				rhinovirus A51
Serratia liquefaciens				rhinovirus C35
Serratia odorifera				rhinovirus C54
Serratia plymuthica				Enterovirus B97
Serratia proteamaculans				rhinovirus B84
Serratia quinivorans				rhinovirus B27
Serratia rubidaea				rhinovirus B79
Serratia ureilytica				rhinovirus B4
Shewanella algae				rhinovirus C19
Shewanella putrefaciens				rhinovirus B5
Shigella boydii				rhinovirus A43
Shigella dysenteriae				rhinovirus B99
Shigella flexneri				rhinovirus A2
Shigella sonnei				rhinovirus A31
Slackia exigua				Enterovirus C105
Sphingobacterium multivorum				rhinovirus A58
Sphingomonas paucimobilis				rhinovirus A100
Staphylococcus aureus				rhinovirus A15
Staphylococcus chromogenes				rhinovirus A55
Staphylococcus capitis				rhinovirus A30
Staphylococcus epidermidis				rhinovirus A77
Staphylococcus haemolyticus				rhinovirus C6
Staphylococcus hominis				rhinovirus C3
Staphylococcus lugdunensis				rhinovirus A67
Staphylococcus saprophyticus				rhinovirus A40
Staphylococcus warneri				rhinovirus A18
Staphylococcus caprae				rhinovirus A74
Staphylococcus cohnii				rhinovirus A38
Staphylococcus pasteuri				rhinovirus A32
Staphylococcus simulans				rhinovirus A50
Staphylococcus xylosus				rhinovirus A63
Stenotrophomonas maltophilia				rhinovirus A80
Streptococcus suis				rhinovirus A90
Streptococcus agalactiae				rhinovirus A76
Streptococcus alactolyticus				rhinovirus A54
Streptococcus constellatus				rhinovirus A23
Streptococcus dysgalactiae				rhinovirus A7
Streptococcus dysgalactiae subsp. equisimilis				rhinovirus A66
Streptococcus equi				rhinovirus A25
Streptococcus equinus				rhinovirus A62
Streptococcus gallolyticus				rhinovirus A71
Streptococcus infantarius				rhinovirus A12
Streptococcus intermedius				rhinovirus A85
Streptococcus mitis				rhinovirus A34
Streptococcus mutans				rhinovirus A16
Streptococcus pneumoniae				Rhinovirus A81
Streptococcus porcinus				rhinovirus A53
Streptococcus pyogenes				rhinovirus A78
Streptococcus anginosus				rhinovirus A45
Streptococcus salivarius				rhinovirus C5
Streptococcus australis				rhinovirus A88
Streptococcus oralis				rhinovirus A33
Streptococcus pasteurianus				rhinovirus A10
Streptococcus sanguinis				rhinovirus A9
Streptococcus viridans				rhinovirus A96
Streptomyces albus				rhinovirus A56
Streptomyces griseus				rhinovirus A24
Streptomyces somaliensis				rhinovirus A94
Stutzerimonas stutzeri				rhinovirus C7
Tatlockia micdadei				enterovirus C118
Treponema denticola				rhinovirus A13
Treponema pallidum				rhinovirus A68
Tropheryma whipplei				rhinovirus A64
Trueperella bernardiae				rhinovirus A22
Trueperella pyogenes				rhinovirus A65
Tsukamurella inchonensis				rhinovirus A11
Tsukamurella strandjordii				rhinovirus A1
Tsukamurella paurometabola				rhinovirus A73
Tsukamurella pulmonis				rhinovirus A75
Tsukamurella tyrosinosolvens				rhinovirus A59
Ureaplasma parvum				rhinovirus A20
Ureaplasma urealyticum				rhinovirus C2
Veillonella atypica				rhinovirus B83
Veillonella dispar				rhinovirus B35
Veillonella montpellierensis				rhinovirus B70
Veillonella parvula				Enterovirus C104
Vibrio alginolyticus				rhinovirus B101
Vibrio mimicus				rhinovirus A19
Vibrio cholerae				rhinovirus A28
Vibrio cholerae O1				rhinovirus A61
Vibrio cholerae O139				rhinovirus B103
Vibrio fluvialis				rhinovirus A41
Vibrio parahaemolyticus				rhinovirus B92
Vibrio vulnificus				Human parechovirus 7
Williamsia muralis				Human parechovirus 4
Winkia neuii				Human parechovirus 6
Yersinia enterocolitica				Human parechovirus 8
Yersinia pestis				Human parechovirus 17
Yersinia pseudotuberculosis				Bunyamwera virus
Yersinia frederiksenii				Human parechovirus 5
Yersinia intermedia				Lyssavirus aravan
Yersinia kristensenii				Onyong-nyong virus
